# Supplementary material for: Charge separation in facet-engineered chalcogenide photocatalyst: a selective photocorrosion approach
Source: Royal Society of Chemistry journal article supplement (doi:10.1039/c4nr02068e), 2014-01-01
Supplement: c4nr02068e1.pdf [file c4nr02068e1.pdf]

## Supporting Information

### **Charge Separation in Facet Engineered Chalcogenide Photocatalyst: A Selective Photocorrosion Approach\*\***

Naixu Li,<sup>[a]</sup> Maochang Liu,<sup>[b]</sup> Zhaohui Zhou,<sup>[b]</sup> Jiancheng Zhou,<sup>\*[a]</sup> Yueming Sun,<sup>[a]</sup> and Liejin Guo<sup>\*[b]</sup>

[a] Prof. J. Zhou, Prof. Y. Sun, N. Li  
School of Chemistry and Chemical Engineering  
Southeast University, Nanjing, Jiangsu, 211189 (P. R. China)  
E-mail: jczhou@seu.edu.cn

[b] Prof. L. Guo, Dr. M. Liu, Dr. Z. Zhou  
International Research Center for Renewable Energy  
State Key Laboratory of Multiphase Flow  
Xi'an Jiaotong University, Xi'an, Shaanxi 710049 (P. R. China)  
E-mail: lj-guo@mail.xjtu.edu.cn

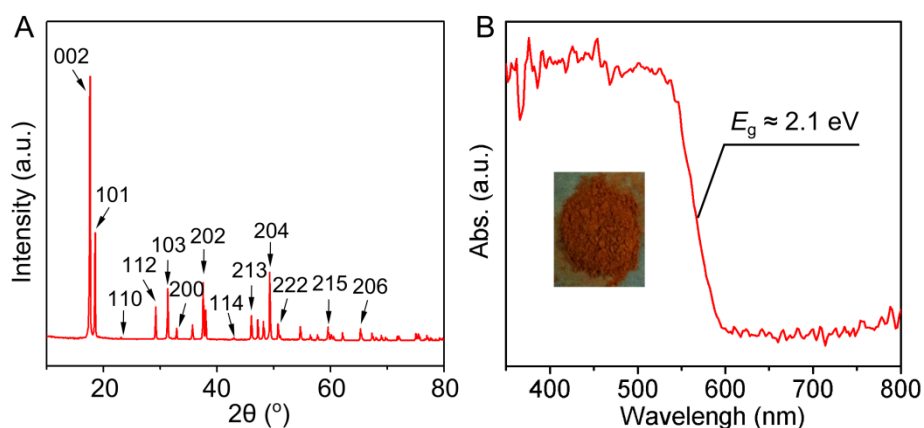

**Figure S1.** A) XRD pattern, and B) UV-vis spectrum of Cu<sub>2</sub>WS<sub>4</sub> photocatalyst. Inset in (B) shows the photo of Cu<sub>2</sub>WS<sub>4</sub> powder. XRD pattern with dominating diffraction peaks of 002 and 101, to some degree, indicate an exposure of {001} and {101} facets. The band gap of the photocatalyst was calculated to be about 2.1 eV according to the Kubelka-Munk method from the UV-vis spectrum.<sup>[1,2]</sup>

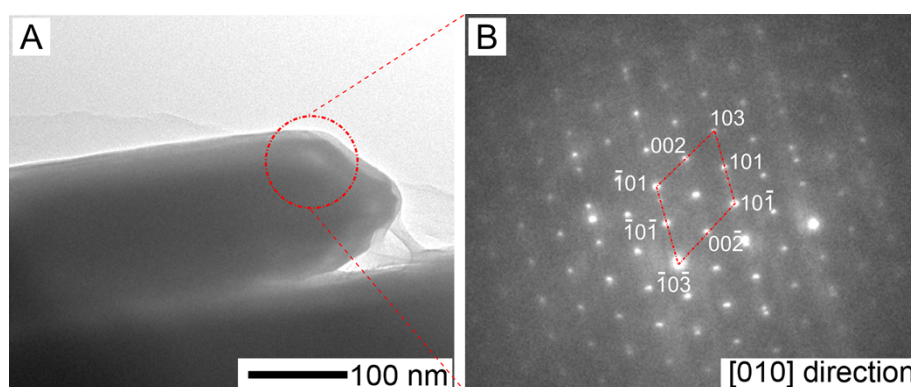

**Figure S2.** A) TEM image viewed from [010] direction, and B) corresponding selected-area electron diffraction (SAED) pattern in the marked area.

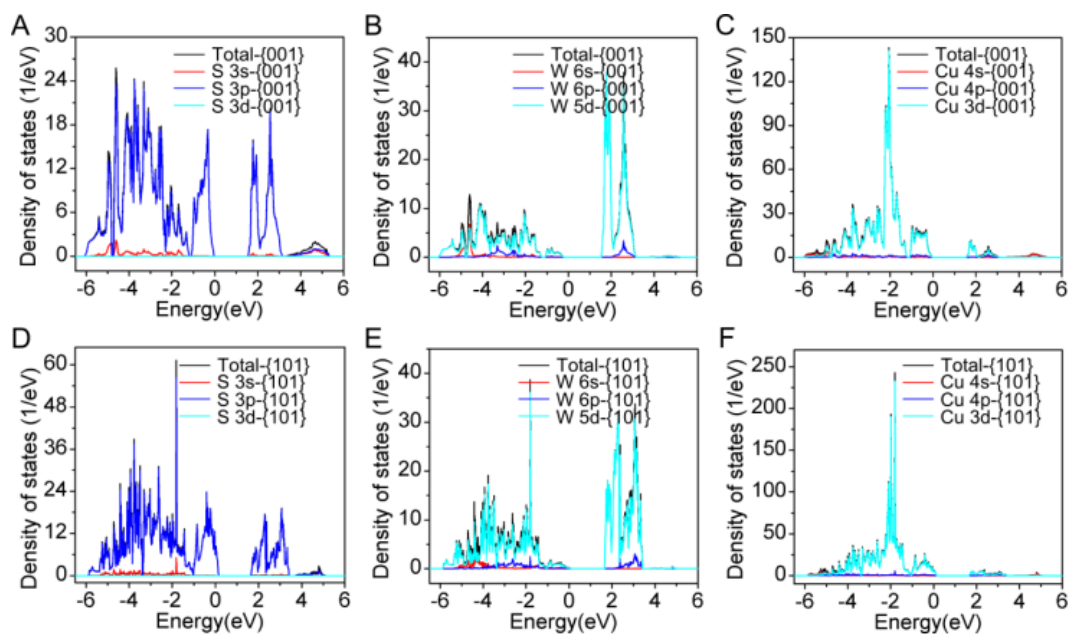

**Figure S3.** Partial density of states (DOS) of S, W, and Cu on the (A-C) {001} and (E-F) {101} facets of  $\text{Cu}_2\text{WS}_4$ . This picture clearly shows the composition of the valence band and conduction band in  $\text{Cu}_2\text{WS}_4$ .

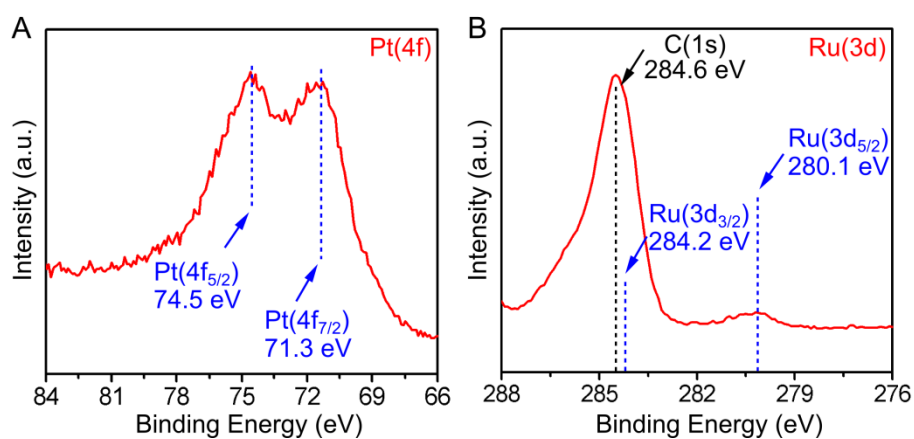

**Figure S4.** High-resolution XPS spectra of A) Pt and B) Ru of 5 wt%  $\text{Pt/Cu}_2\text{WS}_4$  and 5 wt%  $\text{Ru/Cu}_2\text{WS}_4$  photocatalysts. As indicated by the XPS analysis, Pt and Ru are mainly confirmed in their valence states of zero.<sup>[1]</sup>

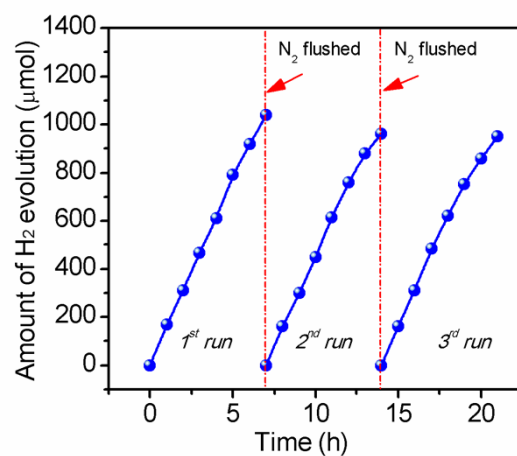

**Figure S5.** Time-coursed photocatalytic hydrogen production over Cu<sub>2</sub>WS<sub>4</sub> decahedra with biggest {001} facets.

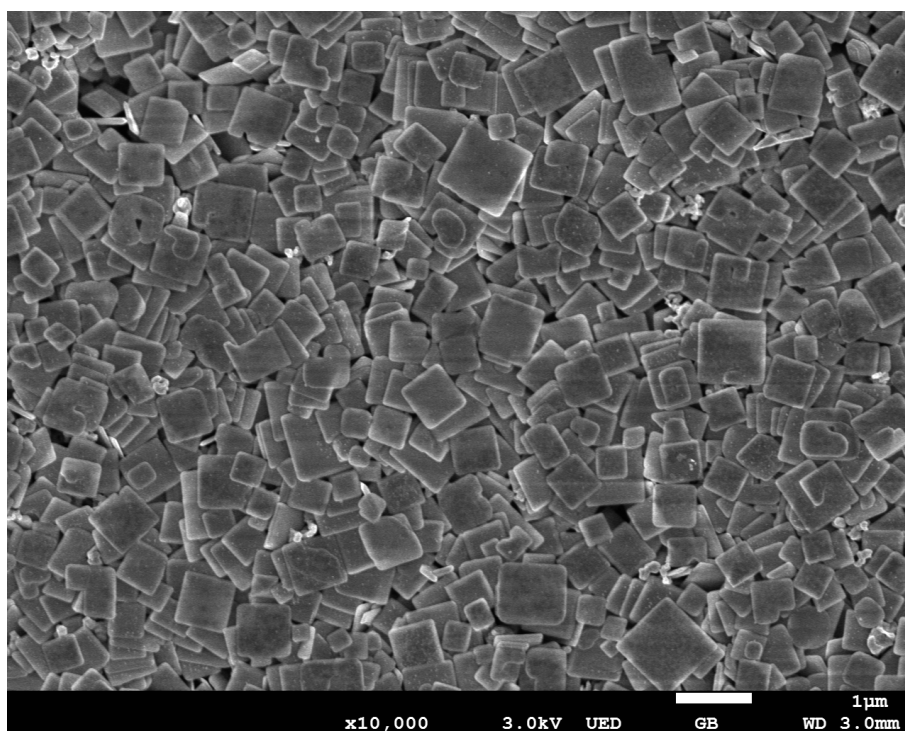

**Figure S6.** SEM image of recovered Pt-Cu<sub>2</sub>WS<sub>4</sub> sample after the reaction shown in Figure S5.

## References

- [1] C. D. Wagner, *Handbook of x-ray photoelectron spectroscopy: a reference book of standard data for use in x-ray photoelectron spectroscopy*, Physical Electronics Division, Perkin-Elmer Corp., **1979**.
- [2] H. Y. Kim, S. Atherton, E. S. Brigham, T. E. Mallouk, *J. Phys. Chem.* **1993**, 97, 11802.
